# Supplementary material
Source: Springer Nature journal article supplement (https://www.springermedizin.de/resource/supplementary/12889_2009_2079_MOESM2_ESM.pdf/9484526)
Supplement: MOESM2 [file 9484526]

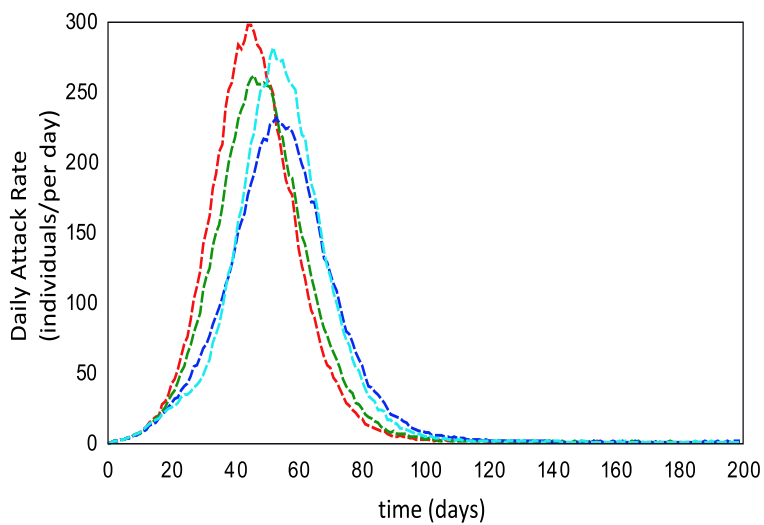

Baseline ---  
 School Case Isolation 1 week ---  
 Individual School Closure 1 week ---  
 All School Closure 1 week ---

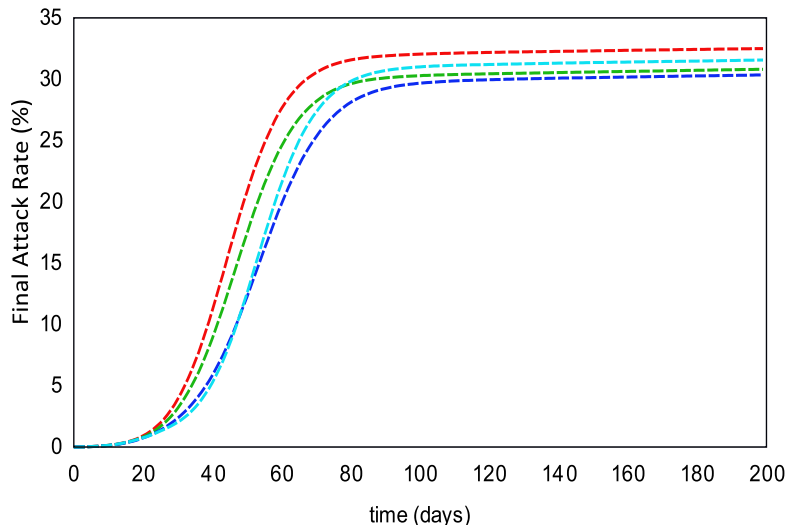

Baseline ---  
 School Case Isolation 1 week ---  
 Individual School Closure 1 week ---  
 All School Closure 1 week ---

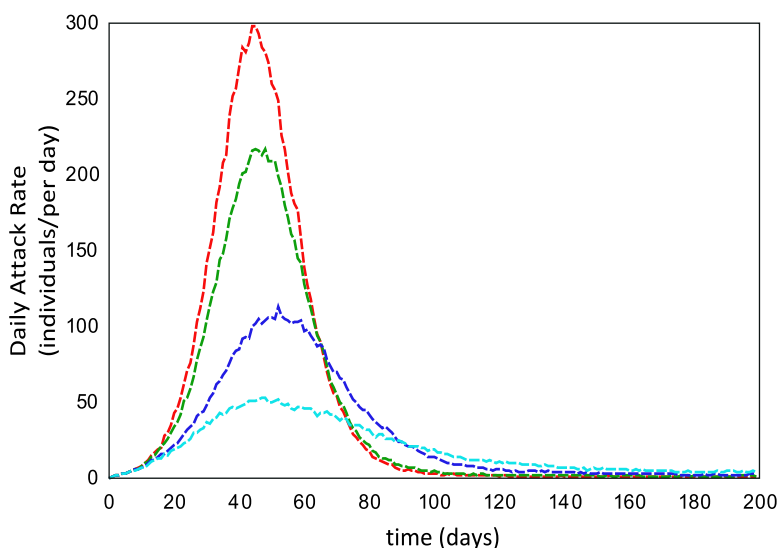

No AV --- T --- T+H --- T+H+E ---

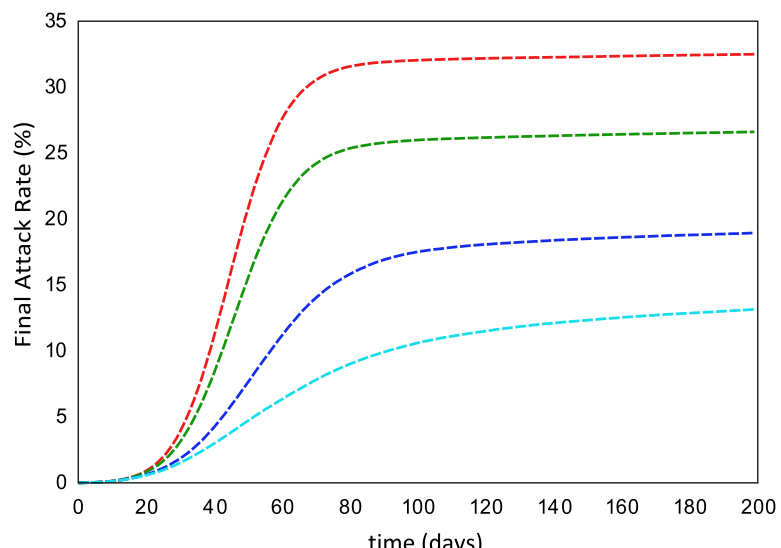

No AV --- T --- T+H --- T+H+E ---

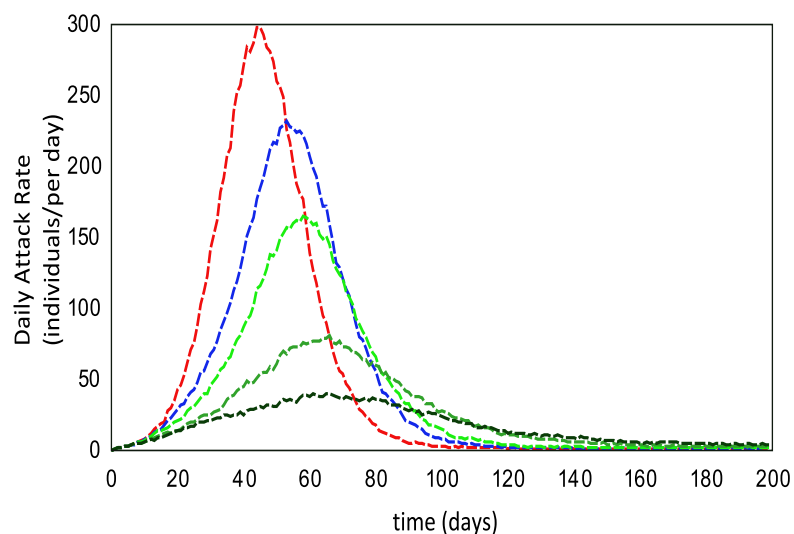

Baseline ---  
 No AV + Individual School Closure 1 week ---  
 T + Individual School Closure 1 week ---  
 T + H + Individual School Closure 1 week ---  
 T + H + E + Individual School Closure 1 week ---

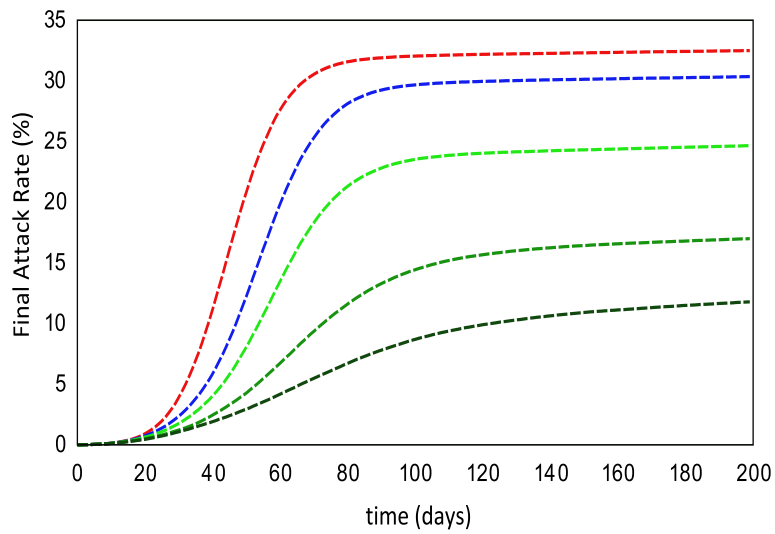

Baseline ---  
 No AV + Individual School Closure 1 week ---  
 T + Individual School Closure 1 week ---  
 T + H + Individual School Closure 1 week ---  
 T + H + E + Individual School Closure 1 week ---
